# Supplementary material
Source: PubMed Central journal article supplement (PMC6943455)
Supplement: ajtr0011-7627-f7.pdf [file ajtr0011-7627-f7.pdf]

## GMSC treats AA mice

**Table S1.** Characteristics of donors for GMSCs

| Age (year) | Gender | Characteristic |
|------------|--------|----------------|
| 25         | Female | Wisdom tooth   |
| 35         | Male   | Wisdom tooth   |
| 18         | Female | Wisdom tooth   |
| 45         | Female | Wisdom tooth   |
| 22         | Male   | Wisdom tooth   |

**Table S2.** Primer for Real-time RT-qPCR

| Target        | Primer sequence        |                       | Product   |    |
|---------------|------------------------|-----------------------|-----------|----|
|               | Sense                  | Antisense             | Size (bp) | Tm |
| Tbx21         | AGCAAGGACGGCGAATGTT    | GGGTGGACATATAAGCGGTTC | 187       | 59 |
| IFN- $\gamma$ | AGCTCTCCTCATGGCTGTT    | TTTGCCAGTTCCTCCAGATA  | 144       | 57 |
| TNF- $\alpha$ | AGTCTGTATCCTTCTAAC     | TTCTGAGTAGTTGTTGAA    | 82        | 57 |
| Stat4         | GACTGTCGGCTCTGCCGTTTCG | GCACGGCTGGGAGCTGTAGTG | 146       | 65 |
| RoryT         | CAGAGGAAGTCAATGTGGGA   | ATGATCTGGTCATTCTGGCA  | 128       | 56 |
| IL-17A        | TCAAAGCTCAGCGTGCCAA    | CGTGGAACGGTTGAGGTAGT  | 133       | 60 |
| IL-23         | TGAGCCCTTAGTGCCAACAG   | CTTGCCCTTCACGCAAACA   | 147       | 60 |
| Foxp3         | TGACAGACACCATCCTAAT    | AGTTCACGAATGTACCAAG   | 76        | 58 |

## GMSC treats AA mice

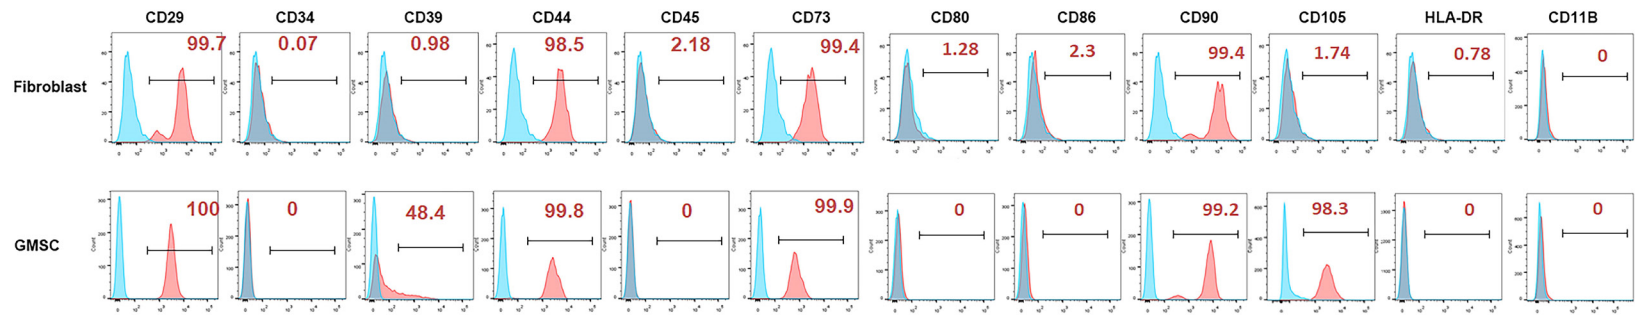

**Figure S1.** Phenotypic and functional characteristics of GMSCs. GMSCs and fibroblast cells were stained with surface markers. Representative flow cytometry data from five independent experiments showed related phenotypes of GMSC and fibroblast cells.
